# Supplementary material for: Monocular and binocular visual impairment in the UK Biobank study: prevalence, associations and diagnoses
Source: PubMed Central journal article supplement — BMJ Open Ophthalmol. 2018 Jan 31;3(1):e000076. doi: 10.1136/bmjophth-2017-000076 (PMC5895967; doi:10.1136/bmjophth-2017-000076), 2018-01-31
Supplement: bmjophth-2017-000076supp001.pdf [file bmjophth-2017-000076supp001.pdf]

**Table 1:**

|                   | <b>Colour fundus photographs</b>                                                                              | <b>OCT images</b>                                                                                                                                                                                      |
|-------------------|---------------------------------------------------------------------------------------------------------------|--------------------------------------------------------------------------------------------------------------------------------------------------------------------------------------------------------|
| <b>Good</b>       | Fovea and optic disc are clearly seen and large retinal vessels are visible across more than 90% of the image | Artifacts are not present and signal strength appears optimal for interpretation of the image set                                                                                                      |
| <b>Adequate</b>   | Fovea and optic disc are clearly seen and more than 67% of the remainder of the image is visible              | Artifacts are present and/or signal strength is reduced, but there is still sufficient intensity to distinguish major interfaces across the entire dataset                                             |
| <b>Inadequate</b> | Either the fovea or the optic disc or more than 33% of the total image are not visible                        | Severe artifacts are present (e.g. "impossible" deviations in retinal contour) or the signal strength is reduced across the image set to the extent that major interfaces cannot be clearly identified |

**Supplementary Table 1 legend:** Image quality definitions for colour fundus photographs and OCT images

**Table 2:**

| Visual impairment category     | Monocular visual impairment (n=6,682) |                  | Binocular visual impairment - Binocular visual impairment - better seeing eye (n=1,677) worse seeing eye (n=1,677) |                  |       |                  |
|--------------------------------|---------------------------------------|------------------|--------------------------------------------------------------------------------------------------------------------|------------------|-------|------------------|
|                                | n                                     | % (95% CI)       | n                                                                                                                  | % (95% CI)       | n     | % (95% CI)       |
| Mild (LogMAR>0.3 to <0.45)     | 3,677                                 | 55.0 (53.8,56.2) | 1,062                                                                                                              | 63.3 (61.0,65.6) | 461   | 27.5 (25.4,29.6) |
| Moderate (LogMAR 0.45 to <1.0) | 2,593                                 | 38.8 (37.6,40.0) | 596                                                                                                                | 35.5 (33.2,37.8) | 1,099 | 65.5 (63.3,67.8) |
| Severe (LogMAR 1.0 to <1.3)    | 373                                   | 5.6 (5.0,6.1)    | 19                                                                                                                 | 1.1 (0.6,1.6)    | 104   | 6.2 (5.0,7.4)    |
| Blindness (LogMAR ≥1.3)        | 39                                    | 0.6 (0.4,0.8)    | 0                                                                                                                  | -                | 13    | 0.8 (0.4,1.2)    |

**Supplementary Table 2 legend:** Categories of visual impairment in the UK Biobank participants

**Table 3:**

| Baseline characteristic (summary statistic)                              | Recorded for cases and controls (n) | Controls           | Cases - Visual Impairment |                     |                     |
|--------------------------------------------------------------------------|-------------------------------------|--------------------|---------------------------|---------------------|---------------------|
|                                                                          |                                     | (n=24,438)         | All (n=8,359)             | Monocular (n=6,682) | Binocular (n=1,677) |
| Age Median (IQR)                                                         | 32,797                              | 60 (53, 64)        | 61 (54, 65)               | 61 (54, 65)         | 61 (54, 65)         |
| Sex                                                                      | 32,797                              |                    |                           |                     |                     |
| Female: n (%)                                                            |                                     | 13498 (55.2)       | 4641 (55.5)               | 3723 (55.7)         | 918 (54.7)          |
| Male: n (%)                                                              |                                     | 10940 (44.8)       | 3718 (44.5)               | 2959 (44.3)         | 759 (45.3)          |
| Ethnic Group                                                             | 32,630                              |                    |                           |                     |                     |
| White: n (%)                                                             |                                     | 22045 (90.7)       | 7465 (89.7)               | 6015 (90.4)         | 1450 (87.1)         |
| Asian or Asian British: n (%)                                            |                                     | 757 (3.1)          | 285 (3.4)                 | 222 (3.3)           | 63 (3.8)            |
| Black or Black British: n (%)                                            |                                     | 1100 (4.5)         | 414 (5.0)                 | 309 (4.6)           | 105 (6.3)           |
| Other ethnic group: n (%)                                                |                                     | 409 (1.7)          | 155 (1.9)                 | 109 (1.6)           | 46 (2.8)            |
| Townsend deprivation score quintiles                                     | 32,757                              |                    |                           |                     |                     |
| 1: n (%) least deprived                                                  |                                     | 4162 (17.0)        | 1275 (15.3)               | 1051 (15.8)         | 224 (13.4)          |
| 2: n (%)                                                                 |                                     | 4729 (19.4)        | 1498 (18.0)               | 1225 (18.4)         | 273 (16.3)          |
| 3: n (%)                                                                 |                                     | 4717 (19.3)        | 1560 (18.7)               | 1279 (19.2)         | 281 (16.8)          |
| 4: n (%)                                                                 |                                     | 5590 (22.9)        | 1885 (22.6)               | 1506 (22.6)         | 379 (22.6)          |
| 5: n (%) most deprived                                                   |                                     | 5215 (21.4)        | 2126 (25.5)               | 1608 (24.1)         | 518 (30.9)          |
| Employment                                                               | 32,409                              |                    |                           |                     |                     |
| Paid / Self-employment / Student: n (%)                                  |                                     | 12621 (52.2)       | 4024 (48.8)               | 3260 (49.4)         | 764 (46.3)          |
| Retired: n (%)                                                           |                                     | 9722 (40.2)        | 3431 (41.6)               | 2740 (41.5)         | 691 (41.9)          |
| Unable to work / Unemployed / Carer / Voluntary Work: n (%)              |                                     | 1816 (7.5)         | 795 (9.6)                 | 600 (9.1)           | 195 (11.8)          |
| Blood pressure diastolic: Median (IQR)                                   | 32,606                              | 82 (75, 89)        | 82 (75, 89)               | 82 (75, 89)         | 82 (75, 89)         |
| Blood pressure systolic: Median (IQR)                                    | 32,605                              | 140 (127, 153)     | 141 (127, 154)            | 140 (127, 154)      | 141 (128, 155)      |
| BMI category                                                             | 31,684                              |                    |                           |                     |                     |
| Normal / Underweight: n (%)                                              |                                     | 7597 (32.2)        | 2523 (31.3)               | 2021 (31.3)         | 502 (31.3)          |
| Overweight: n (%)                                                        |                                     | 10287 (43.5)       | 3459 (42.9)               | 2801 (43.4)         | 658 (41.0)          |
| Obese: n (%)                                                             |                                     | 5738 (24.3)        | 2080 (25.8)               | 1634 (25.3)         | 446 (27.8)          |
| Whole body impedance: median (IQR)                                       | 31,831                              | 597 (534, 665)     | 596 (532, 662.5)          | 597 (533, 663)      | 592 (530, 662)      |
| Waist Hip Ratio: median (IQR)                                            | 32,696                              | 0.88 (0.81, 0.94)  | 0.88 (0.81, 0.95)         | 0.88 (0.81, 0.94)   | 0.89 (0.82, 0.95)   |
| Pulse wave Arterial Stiffness index: median (IQR)                        | 32,445                              | 9.33 (7.3, 11.34)  | 9.44 (7.35, 11.46)        | 9.44 (7.36, 11.47)  | 9.43 (7.25, 11.41)  |
| Current Smoking                                                          | 32,728                              |                    |                           |                     |                     |
| No: n (%)                                                                |                                     | 22263 (91.3)       | 7468 (89.4)               | 5996 (89.8)         | 1472 (87.9)         |
| Yes: n (%)                                                               |                                     | 1500 (6.2)         | 663 (7.9)                 | 507 (7.6)           | 156 (9.3)           |
| Occasionally: n (%)                                                      |                                     | 616 (2.5)          | 218 (2.6)                 | 172 (2.6)           | 46 (2.7)            |
| Past smoking                                                             | 30,460                              |                    |                           |                     |                     |
| Smoked on most or all days: n (%)                                        |                                     | 6075 (26.6)        | 2034 (26.6)               | 1631 (26.5)         | 403 (26.7)          |
| Smoked occasionally: n (%)                                               |                                     | 3349 (14.7)        | 1113 (14.5)               | 886 (14.4)          | 227 (15.0)          |
| Just tried once or twice: n (%)                                          |                                     | 3655 (16.0)        | 1160 (15.1)               | 951 (15.5)          | 209 (13.8)          |
| I have never smoked: n (%)                                               |                                     | 9721 (42.6)        | 3353 (43.8)               | 2680 (43.6)         | 673 (44.5)          |
| Any smoker in household                                                  | 30,528                              |                    |                           |                     |                     |
| No: n (%)                                                                |                                     | 20643 (90.3)       | 6841 (89.1)               | 5481 (88.9)         | 1360 (89.8)         |
| Yes: n (%)                                                               |                                     | 2207 (9.7)         | 837 (10.9)                | 682 (11.1)          | 155 (10.2)          |
| Estimated daily nutrient intake                                          |                                     |                    |                           |                     |                     |
| Total energy: median (IQR)                                               | 21,075                              | 8458 (7006, 10137) | 8439 (6897, 10110)        | 8434 (6934, 10111)  | 8449 (6739, 10082)  |
| Total carotene: median (IQR)                                             | 21,075                              | 2524 (1192, 4312)  | 2505 (1103, 4270)         | 2546 (1140, 4292)   | 2322 (917, 4058)    |
| Total Retinol: median (IQR)                                              | 20,757                              | 294 (193, 414)     | 282 (184, 411)            | 282 (184, 412)      | 283 (181, 408)      |
| Total Vitamin C: median (IQR)                                            | 21,075                              | 129 (78, 195)      | 128 (74, 194)             | 130 (76, 194)       | 122 (71, 189)       |
| Total Vitamin E: median (IQR)                                            | 21,075                              | 8.43 (6.14, 11.28) | 8.27 (5.93, 11.27)        | 8.33 (6, 11.31)     | 8.03 (5.65, 10.94)  |
| Average monthly number of alcoholic drinks: median (IQR)                 | 7,753                               | 3 (1, 6)           | 3 (1, 5)                  | 3 (1, 5)            | 2 (0, 6)            |
| Number of days/week of moderate/vigorous physical exercise: median (IQR) | 32,020                              | 4 (2, 5)           | 4 (2, 6)                  | 4 (2, 6)            | 4 (2, 6)            |
| Medications                                                              |                                     |                    |                           |                     |                     |
| Systemic hypertension: n (%)                                             | 32,562                              | 5570 (22.9)        | 2130 (25.7)               | 1674 (25.3)         | 456 (27.5)          |
| Hypercholesterolaemia: n (%)                                             | 32,562                              | 5044 (20.8)        | 1876 (22.7)               | 1509 (22.8)         | 367 (22.1)          |
| Medical History                                                          |                                     |                    |                           |                     |                     |
| Cancer: n (%)                                                            | 32,797                              | 2393 (9.8)         | 871 (10.4)                | 687 (10.3)          | 184 (11.0)          |
| Diabetes: n (%)                                                          | 25,647                              | 1385 (7.3)         | 595 (8.8)                 | 461 (8.5)           | 134 (10.0)          |
| Cardiovascular and cerebrovascular disease: n (%)                        | 25,647                              | 7601 (40.2)        | 2866 (42.6)               | 2280 (42.3)         | 586 (43.9)          |
| Depression: n (%)                                                        | 25,647                              | 1312 (6.9)         | 476 (7.1)                 | 383 (7.1)           | 93 (7.0)            |

|                                                                          |        |                    |                    |                    |                    |
|--------------------------------------------------------------------------|--------|--------------------|--------------------|--------------------|--------------------|
| Current Smoking                                                          | 32,728 |                    |                    |                    |                    |
| No: n (%)                                                                |        | 22263 (91.3)       | 7468 (89.4)        | 5996 (89.8)        | 1472 (87.9)        |
| Yes: n (%)                                                               |        | 1500 (6.2)         | 663 (7.9)          | 507 (7.6)          | 156 (9.3)          |
| Occasionally: n (%)                                                      |        | 616 (2.5)          | 218 (2.6)          | 172 (2.6)          | 46 (2.7)           |
| Past smoking                                                             | 30,460 |                    |                    |                    |                    |
| Smoked on most or all days: n (%)                                        |        | 6075 (26.6)        | 2034 (26.6)        | 1631 (26.5)        | 403 (26.7)         |
| Smoked occasionally: n (%)                                               |        | 3349 (14.7)        | 1113 (14.5)        | 886 (14.4)         | 227 (15.0)         |
| Just tried once or twice: n (%)                                          |        | 3655 (16.0)        | 1160 (15.1)        | 951 (15.5)         | 209 (13.8)         |
| I have never smoked: n (%)                                               |        | 9721 (42.6)        | 3353 (43.8)        | 2680 (43.6)        | 673 (44.5)         |
| Any smoker in household                                                  | 30,528 |                    |                    |                    |                    |
| No: n (%)                                                                |        | 20643 (90.3)       | 6841 (89.1)        | 5481 (88.9)        | 1360 (89.8)        |
| Yes: n (%)                                                               |        | 2207 (9.7)         | 837 (10.9)         | 682 (11.1)         | 155 (10.2)         |
| Estimated daily nutrient intake                                          |        |                    |                    |                    |                    |
| Total energy: median (IQR)                                               | 21,075 | 8458 (7006, 10137) | 8439 (6897, 10110) | 8434 (6934, 10111) | 8449 (6739, 10082) |
| Total carotene: median (IQR)                                             | 21,075 | 2524 (1192, 4312)  | 2505 (1103, 4270)  | 2546 (1140, 4292)  | 2322 (917, 4058)   |
| Total Retinol: median (IQR)                                              | 20,757 | 294 (193, 414)     | 282 (184, 411)     | 282 (184, 412)     | 283 (181, 408)     |
| Total Vitamin C: median (IQR)                                            | 21,075 | 129 (78, 195)      | 128 (74, 194)      | 130 (76, 194)      | 122 (71, 189)      |
| Total Vitamin E: median (IQR)                                            | 21,075 | 8.43 (6.14, 11.28) | 8.27 (5.93, 11.27) | 8.33 (6, 11.31)    | 8.03 (5.65, 10.94) |
| Average monthly number of alcoholic drinks: median (IQR)                 | 7,753  | 3 (1, 6)           | 3 (1, 5)           | 3 (1, 5)           | 2 (0, 6)           |
| Number of days/week of moderate/vigorous physical exercise: median (IQR) | 32,020 | 4 (2, 5)           | 4 (2, 6)           | 4 (2, 6)           | 4 (2, 6)           |
| Medications                                                              |        |                    |                    |                    |                    |
| Systemic hypertension: n (%)                                             | 32,562 | 5570 (22.9)        | 2130 (25.7)        | 1674 (25.3)        | 456 (27.5)         |
| Hypercholesterolaemia: n (%)                                             | 32,562 | 5044 (20.8)        | 1876 (22.7)        | 1509 (22.8)        | 367 (22.1)         |
| Medical History                                                          |        |                    |                    |                    |                    |
| Cancer: n (%)                                                            | 32,797 | 2393 (9.8)         | 871 (10.4)         | 687 (10.3)         | 184 (11.0)         |
| Diabetes: n (%)                                                          | 25,647 | 1385 (7.3)         | 595 (8.8)          | 461 (8.5)          | 134 (10.0)         |
| Cardiovascular and cerebrovascular disease: n (%)                        | 25,647 | 7601 (40.2)        | 2866 (42.6)        | 2280 (42.3)        | 586 (43.9)         |
| Depression: n (%)                                                        | 25,647 | 1312 (6.9)         | 476 (7.1)          | 383 (7.1)          | 93 (7.0)           |

**Supplementary Table 3 legend: Baseline characteristics for the cases and controls**

**Table 4:**

| Variable                                                                                     | Univariate - compared to Controls                                               |                                                                                 | Multivariable* - compared to Controls                                           |                                                                                 |
|----------------------------------------------------------------------------------------------|---------------------------------------------------------------------------------|---------------------------------------------------------------------------------|---------------------------------------------------------------------------------|---------------------------------------------------------------------------------|
|                                                                                              | Association with Monocular Visual Impairment Relative Risk Ratio - RRR (95% CI) | Association with Binocular Visual Impairment Relative Risk Ratio - RRR (95% CI) | Association with Monocular Visual Impairment Relative Risk Ratio - RRR (95% CI) | Association with Binocular Visual Impairment Relative Risk Ratio - RRR (95% CI) |
| Age (per decade) <sup>##</sup>                                                               | 1.12 (1.08, 1.16)                                                               | 1.18 (1.1, 1.26)                                                                | 1.13 (1.09, 1.17)                                                               | 1.24 (1.15, 1.33)                                                               |
| Sex (compared to male)                                                                       |                                                                                 |                                                                                 |                                                                                 |                                                                                 |
| Female                                                                                       | 0.98 (0.93, 1.04)                                                               | 1.02 (0.92, 1.13)                                                               | 0.97 (0.92, 1.03)                                                               | 1.01 (0.92, 1.12)                                                               |
| Ethnic Group (compared to White) <sup>##</sup>                                               |                                                                                 |                                                                                 |                                                                                 |                                                                                 |
| Asian or Asian British                                                                       | 1.07 (0.92, 1.25)                                                               | 1.27 (0.97, 1.64)                                                               | 1.07 (0.92, 1.25)                                                               | 1.21 (0.93, 1.58)                                                               |
| Black or Black British                                                                       | 1.03 (0.9, 1.17)                                                                | 1.45 (1.18, 1.79)                                                               | 1.01 (0.88, 1.15)                                                               | 1.29 (1.04, 1.6)                                                                |
| Other ethnic group                                                                           | 0.98 (0.79, 1.21)                                                               | 1.71 (1.25, 2.33)                                                               | 0.95 (0.77, 1.18)                                                               | 1.53 (1.12, 2.09)                                                               |
| Townsend deprivation score quintiles (compared to quintile 1 = least deprived) <sup>##</sup> |                                                                                 |                                                                                 |                                                                                 |                                                                                 |
| 2                                                                                            | 1.03 (0.94, 1.13)                                                               | 1.07 (0.89, 1.29)                                                               | 1.03 (0.94, 1.13)                                                               | 1.08 (0.9, 1.3)                                                                 |
| 3                                                                                            | 1.07 (0.98, 1.18)                                                               | 1.11 (0.92, 1.33)                                                               | 1.08 (0.98, 1.18)                                                               | 1.11 (0.93, 1.33)                                                               |
| 4                                                                                            | 1.07 (0.98, 1.17)                                                               | 1.26 (1.06, 1.49)                                                               | 1.08 (0.99, 1.18)                                                               | 1.26 (1.06, 1.49)                                                               |
| 5 - most deprived                                                                            | 1.22 (1.12, 1.33)                                                               | 1.85 (1.57, 2.17)                                                               | 1.25 (1.14, 1.36)                                                               | 1.84 (1.56, 2.17)                                                               |
| Employment (compared to Paid / Self-employment / Student) <sup>##</sup>                      |                                                                                 |                                                                                 |                                                                                 |                                                                                 |
| Retired                                                                                      | 1.09 (1.03, 1.16)                                                               | 1.17 (1.06, 1.31)                                                               |                                                                                 |                                                                                 |
| Unable to work / Unemployed / Carer / Voluntary Work                                         | 1.28 (1.16, 1.41)                                                               | 1.77 (1.5, 2.09)                                                                |                                                                                 |                                                                                 |
| BP diastolic (per increase 1)                                                                | 0.999 (0.996, 1.001)                                                            | 0.999 (0.995, 1.004)                                                            |                                                                                 |                                                                                 |
| BP systolic (per increase 1) <sup>##</sup>                                                   | 1.001 (1.000004, 1.003)                                                         | 1.003 (1.001, 1.006)                                                            |                                                                                 |                                                                                 |
| BMI category (compared to normal / underweight) <sup>#</sup>                                 |                                                                                 |                                                                                 |                                                                                 |                                                                                 |
| Overweight                                                                                   | 1.02 (0.96, 1.09)                                                               | 0.97 (0.86, 1.09)                                                               |                                                                                 |                                                                                 |
| Obese                                                                                        | 1.07 (0.99, 1.15)                                                               | 1.18 (1.03, 1.34)                                                               |                                                                                 |                                                                                 |
| Whole body impedance (per increase 100)                                                      | 0.995 (0.97, 1.03)                                                              | 0.95 (0.9, 1.01)                                                                |                                                                                 |                                                                                 |
| Waist Hip Ratio (per increase 0.1) <sup>##</sup>                                             | 1.04 (1.01, 1.07)                                                               | 1.14 (1.08, 1.2)                                                                |                                                                                 |                                                                                 |
| Pulse wave Arterial Stiffness index (per increase 1)                                         | 1.003 (0.997, 1.01)                                                             | 1.002 (0.99, 1.01)                                                              |                                                                                 |                                                                                 |
| Current Smoking (compared to No) <sup>##</sup>                                               |                                                                                 |                                                                                 |                                                                                 |                                                                                 |
| Yes                                                                                          | 1.25 (1.13, 1.39)                                                               | 1.57 (1.32, 1.87)                                                               |                                                                                 |                                                                                 |
| Occasionally                                                                                 | 1.04 (0.87, 1.23)                                                               | 1.13 (0.83, 1.53)                                                               |                                                                                 |                                                                                 |
| Past smoking (compared to smoked on most or all days)                                        |                                                                                 |                                                                                 |                                                                                 |                                                                                 |
| Smoked occasionally                                                                          | 0.99 (0.9, 1.08)                                                                | 1.02 (0.86, 1.21)                                                               |                                                                                 |                                                                                 |
| Just tried once or twice                                                                     | 0.97 (0.89, 1.06)                                                               | 0.86 (0.73, 1.02)                                                               |                                                                                 |                                                                                 |
| I have never smoked                                                                          | 1.03 (0.96, 1.1)                                                                | 1.04 (0.92, 1.19)                                                               |                                                                                 |                                                                                 |
| Smoker in household (compared to No) <sup>##</sup>                                           |                                                                                 |                                                                                 |                                                                                 |                                                                                 |
| Yes                                                                                          | 1.16 (1.06, 1.27)                                                               | 1.07 (0.9, 1.27)                                                                |                                                                                 |                                                                                 |
| Estimated daily nutrient intake                                                              |                                                                                 |                                                                                 |                                                                                 |                                                                                 |
| Total energy (per increase 1)                                                                | 0.999997 (0.99998, 1.00001)                                                     | 0.99998 (0.99996, 1.00001)                                                      |                                                                                 |                                                                                 |
| Total carotene (per increase 1)                                                              | 1.000001 (0.99999, 1.00001)                                                     | 0.99998 (0.99996, 1.00001)                                                      |                                                                                 |                                                                                 |
| Total Retinol (per increase 1) <sup>#</sup>                                                  | 0.9998 (0.9996, 1.00001)                                                        | 0.9997 (0.9993, 1.0001)                                                         |                                                                                 |                                                                                 |
| Total Vitamin C (per increase 1)                                                             | 1.0001 (0.9998, 1.0004)                                                         | 0.9996 (0.9989, 1.0003)                                                         |                                                                                 |                                                                                 |
| Total Vitamin E (per increase 1)                                                             | 1.001 (0.994, 1.008)                                                            | 0.99 (0.97, 1.0001)                                                             |                                                                                 |                                                                                 |
| Average monthly number of alcoholic drinks (per increase 1)                                  | 0.995 (0.98, 1.01)                                                              | 0.99 (0.96, 1.01)                                                               |                                                                                 |                                                                                 |
| Number of days / week of moderate / vigorous physical exercise (per increase 1)              | 1.004 (0.99, 1.02)                                                              | 1.02 (0.998, 1.04)                                                              |                                                                                 |                                                                                 |
| Medications (compared to none)                                                               |                                                                                 |                                                                                 |                                                                                 |                                                                                 |
| Systemic hypertension <sup>##</sup>                                                          | 1.14 (1.07, 1.21)                                                               | 1.27 (1.14, 1.42)                                                               |                                                                                 |                                                                                 |
| Hypercholesterolaemia <sup>##</sup>                                                          | 1.13 (1.05, 1.2)                                                                | 1.08 (0.96, 1.22)                                                               |                                                                                 |                                                                                 |
| Medical History (compared to none)                                                           |                                                                                 |                                                                                 |                                                                                 |                                                                                 |
| Cancer                                                                                       | 1.06 (0.97, 1.15)                                                               | 1.14 (0.97, 1.33)                                                               |                                                                                 |                                                                                 |
| Diabetes <sup>##</sup>                                                                       | 1.18 (1.06, 1.32)                                                               | 1.41 (1.17, 1.7)                                                                |                                                                                 |                                                                                 |
| Cardiovascular and cerebrovascular disease <sup>##</sup>                                     | 1.09 (1.03, 1.16)                                                               | 1.16 (1.04, 1.3)                                                                |                                                                                 |                                                                                 |
| Depression                                                                                   | 1.03 (0.91, 1.15)                                                               | 1 (0.81, 1.25)                                                                  |                                                                                 |                                                                                 |

<sup>#</sup> Univariate association with Visual Impairment at 10% level - included in initial multivariable model

<sup>##</sup> Univariate association with Visual Impairment at 5% level - included in initial multivariable model

<sup>\*</sup> Those variables identified as associated univariately (<10% level) were included in a multivariable model and remained in model if significantly associated at 5% level. As cases were matched by age, sex and ethnic group, these variables were included in the multivariable model irrespective of their association.

|                                                                                 |                             |                            |
|---------------------------------------------------------------------------------|-----------------------------|----------------------------|
| Past smoking (compared to smoked on most or all days)                           |                             |                            |
| Smoked occasionally                                                             | 0.99 (0.9, 1.08)            | 1.02 (0.86, 1.21)          |
| Just tried once or twice                                                        | 0.97 (0.89, 1.06)           | 0.86 (0.73, 1.02)          |
| I have never smoked                                                             | 1.03 (0.96, 1.1)            | 1.04 (0.92, 1.19)          |
| Smoker in household (compared to No) <sup>##</sup>                              |                             |                            |
| Yes                                                                             | 1.16 (1.06, 1.27)           | 1.07 (0.9, 1.27)           |
| Estimated daily nutrient intake                                                 |                             |                            |
| Total energy (per increase 1)                                                   | 0.999997 (0.99998, 1.00001) | 0.99998 (0.99996, 1.00001) |
| Total carotene (per increase 1)                                                 | 1.000001 (0.99999, 1.00001) | 0.99998 (0.99996, 1.00001) |
| Total Retinol (per increase 1) <sup>#</sup>                                     | 0.9998 (0.9996, 1.00001)    | 0.9997 (0.9993, 1.0001)    |
| Total Vitamin C (per increase 1)                                                | 1.0001 (0.9998, 1.0004)     | 0.9996 (0.9989, 1.0003)    |
| Total Vitamin E (per increase 1)                                                | 1.001 (0.994, 1.008)        | 0.99 (0.97, 1.0001)        |
| Average monthly number of alcoholic drinks (per increase 1)                     | 0.995 (0.98, 1.01)          | 0.99 (0.96, 1.01)          |
| Number of days / week of moderate / vigorous physical exercise (per increase 1) | 1.004 (0.99, 1.02)          | 1.02 (0.998, 1.04)         |
| Medications (compared to none)                                                  |                             |                            |
| Systemic hypertension <sup>##</sup>                                             | 1.14 (1.07, 1.21)           | 1.27 (1.14, 1.42)          |
| Hypercholesterolaemia <sup>##</sup>                                             | 1.13 (1.05, 1.2)            | 1.08 (0.96, 1.22)          |
| Medical History (compared to none)                                              |                             |                            |
| Cancer                                                                          | 1.06 (0.97, 1.15)           | 1.14 (0.97, 1.33)          |
| Diabetes <sup>##</sup>                                                          | 1.18 (1.06, 1.32)           | 1.41 (1.17, 1.7)           |
| Cardiovascular and cerebrovascular disease <sup>##</sup>                        | 1.09 (1.03, 1.16)           | 1.16 (1.04, 1.3)           |
| Depression                                                                      | 1.03 (0.91, 1.15)           | 1 (0.81, 1.25)             |

<sup>#</sup> Univariate association with Visual Impairment at 10% level - included in initial multivariable model

<sup>##</sup> Univariate association with Visual Impairment at 5% level - included in initial multivariable model

<sup>∇</sup> Those variables identified as associated univariately (<10% level) were included in a multivariable model and remained in model if significantly associated at 5% level. As cases were matched by age, sex and ethnic group, these variables were included in the multivariable model irrespective of their association.

## Supplementary Table 4 legend: Associations with monocular or binocular visual impairment by univariate and multivariable logistic regression analysis

**Table 5:**

| Primary diagnosis                      | Monocular visual impairment (n=1684) |                  | Binocular visual impairment - better seeing eye (n=406) |                  | Binocular visual impairment - worse seeing eye (n=406) |                  |
|----------------------------------------|--------------------------------------|------------------|---------------------------------------------------------|------------------|--------------------------------------------------------|------------------|
|                                        | n                                    | % (95% CI)       | n                                                       | % (95% CI)       | n                                                      | % (95% CI)       |
| Amblyopia                              | 218                                  | 12.9 (11.3,14.5) | 4                                                       | 1 (0.0,0.2)      | 8                                                      | 2 (0.6,3.4)      |
| ARMD                                   | 25                                   | 1.5 (0.9,2.1)    | 8                                                       | 2 (0.6,3.4)      | 6                                                      | 1.5 (0.3,2.7)    |
| Cannot grade                           | 3                                    | 0.2 (0,0.4)      | 3                                                       | 0.7 (-0.1,1.5)   | 5                                                      | 1.2 (0.1,2.3)    |
| Cataract                               | 255                                  | 15.1 (13.4,16.8) | 78                                                      | 19.2 (15.4,23.0) | 71                                                     | 17.5 (13.8,21.2) |
| Diabetic retinopathy                   | 2                                    | 0.1 (-0.1,0.3)   | 2                                                       | 0.5 (-0.2,1.2)   | 3                                                      | 0.7 (-0.1,1.5)   |
| Glaucoma                               | 10                                   | 0.6 (0.2,1.0)    | 3                                                       | 0.7 (-0.1,1.5)   | 4                                                      | 1 (0.0,2.0)      |
| Inherited retinal disease              | 7                                    | 0.4 (0.1,0.7)    | 3                                                       | 0.7 (-0.1,1.5)   | 4                                                      | 1 (0.0,2.0)      |
| Myopic degeneration                    | 12                                   | 0.7 (0.3,1.1)    | 2                                                       | 0.5 (-0.2,1.2)   | 1                                                      | 0.2 (-0.2,0.6)   |
| None identified                        | 822                                  | 48.8 (46.4,51.2) | 202                                                     | 49.8 (44.9,54.7) | 199                                                    | 49 (44.1,53.9)   |
| Uncorrected refractive error           | 215                                  | 12.8 (11.2,14.4) | 80                                                      | 19.7 (15.8,23.6) | 76                                                     | 18.7 (14.9,22.5) |
| Other media opacity                    | 20                                   | 1.2 (0.7,1.7)    | 5                                                       | 1.2 (0.1,2.3)    | 0                                                      | 0                |
| Other retinal or optic nerve pathology | 19                                   | 1.1 (0.6,1.6)    | 2                                                       | 0.5 (-0.2,1.2)   | 9                                                      | 2.2 (0.8,3.6)    |
| Other retinal vascular disease         | 11                                   | 0.7 (0.3,1.1)    | 2                                                       | 0.5 (-0.2,1.2)   | 2                                                      | 0.5 (-0.2,1.2)   |
| Retinal detachment                     | 5                                    | 0.3 (0.0,0.6)    | 0                                                       | 0                | 1                                                      | 0.2 (-0.2,0.6)   |
| Vitreo-retinal interface abnormalities | 60                                   | 3.6 (2.7,4.5)    | 12                                                      | 3 (1.3,4.7)      | 17                                                     | 4.2 (2.2,6.2)    |

## Supplementary Table 5 legend: Primary diagnoses leading to monocular and binocular visual impairment
